# Supplementary material for: An ultrahigh thermal conductive graphene flexible paper
Source: Royal Society of Chemistry journal article supplement (doi:10.1039/c7nr06667h), 2017-01-01
Supplement: c7nr06667h1.pdf [file c7nr06667h1.pdf]

## Supporting Information

### Ultrahigh Thermal Conductive Graphene Flexible Paper

*Jiheng Ding,<sup>1</sup> Hongran Zhao,<sup>1\*</sup> Qiaolei Wang,<sup>1,2</sup> Huimin Dou,<sup>1,3</sup> Hao Chen,<sup>1,4</sup> Haibin Yu<sup>1\*</sup>*

1. Key Laboratory of Marine Materials and Related Technologies, Key Laboratory of Marine Materials and Protective Technologies of Zhejiang Province, Ningbo Institute of Materials Technology and Engineering, Chinese Academy of Sciences, Ningbo 315201, P. R. China;
2. College of Chemistry and Chemical Engineering, Hunan Normal University, Changsha 410081, P. R. China;
3. College of Chemistry and Chemical Engineering, Shanghai University, Changsha 410081, P. R. China;
4. College of Chemistry and Chemical Engineering, Ningbo University, Changsha 410081, P. R. China;

\* Corresponding author: Tel.: +86 0574 87911126.

E-mail addresses: zhaohongran@nimte.ac.cn; haibinyu@nimte.ac.cn;

---

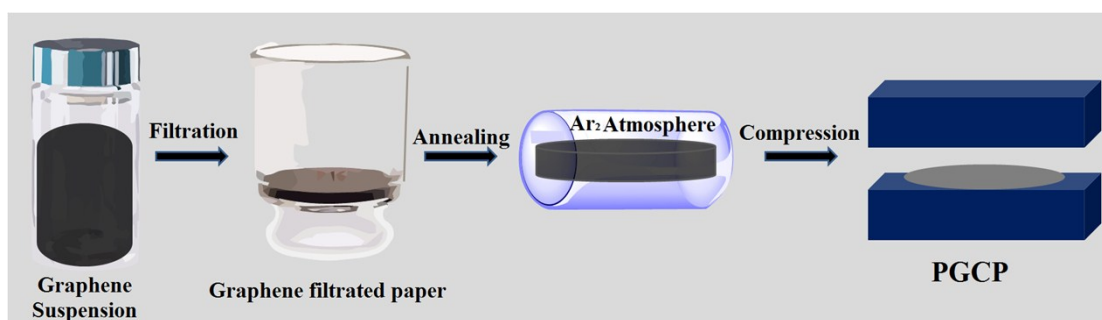

**Figure S1.** Preparation process of graphene paper.

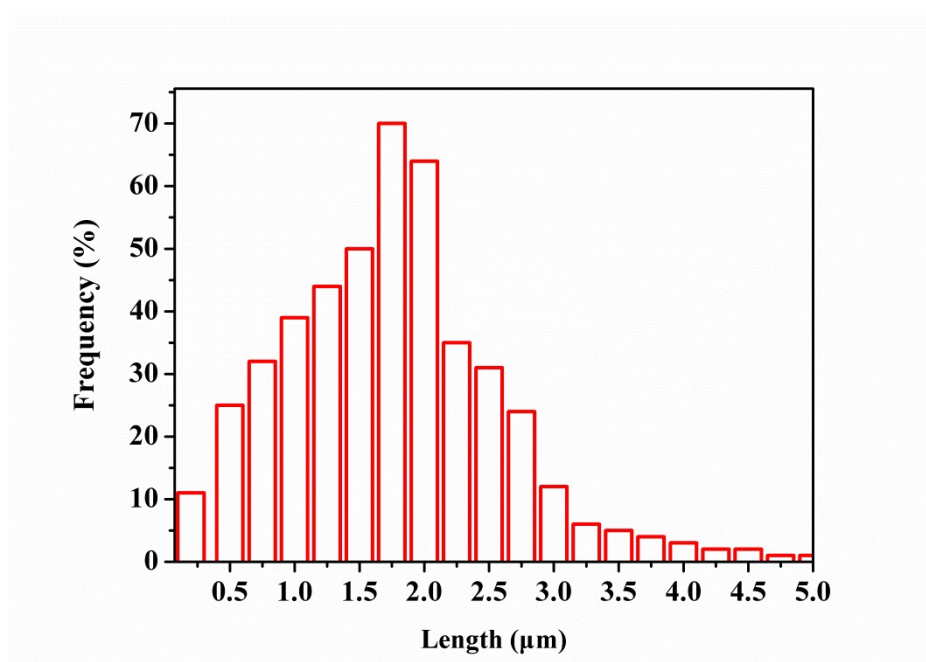

**Figure S2.** The distribution of the lateral size of graphene sheets.

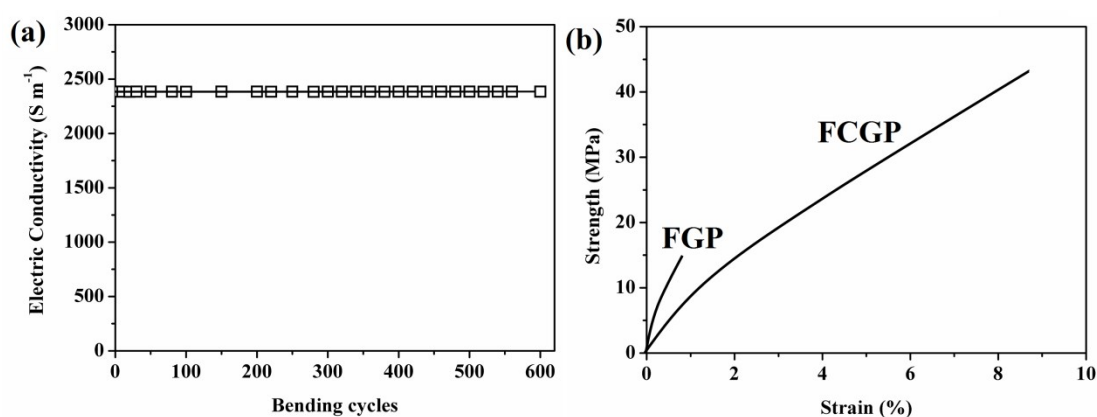

**Figure S3.** (a) Electric conductivity change of a FCGP with bending test; (b) Tensile curves of FGP and FCGP.
